# Supplementary material
Source: Springer Nature journal article supplement (https://www.springermedizin.de/resource/supplementary/12888_2011_913_MOESM1_ESM.pdf/9478546)
Supplement: MOESM1 [file 9478546]

Patients screened  
718

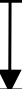

Excluded due to  
protocol violation\*  
76

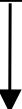

Early discontinuations  
(no reason specified)  
120

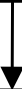

Full Analysis Set (FAS)  
642 (100%)

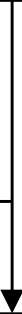

Completers  
Full Analysis Set (FAS)  
522 (81.3%)

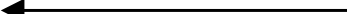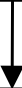

Complete Metabolic Data Set\*\*  
(CMD)  
476 (100%)
